# Supplementary material for: Design, synthesis, molecular docking and ADME studies of novel indole-thiazolidinedione derivatives and their antineoplastic activity as CDK6 inhibitors
Source: Royal Society of Chemistry journal article supplement (doi:10.1039/d1nj02808a), 2021-01-01

**Design, Synthesis, Molecular Docking and ADME Studies of Novel Indole-Thiazolidinedione Derivatives and their Antineoplastic Activity as CDK6 Inhibitors**

**Supplementary Data**

**Suppl. Figure 1.**  $^1\text{H}$  NMR spectrum of compound **9**.

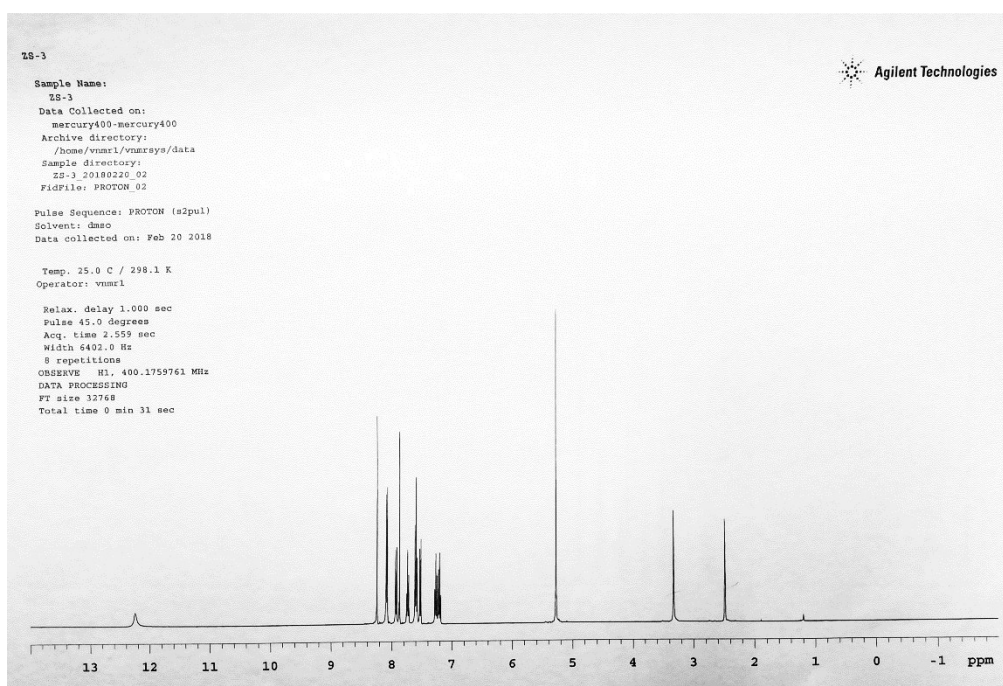

**Suppl. Figure 2.**  $^1\text{H}$  NMR spectrum of compound **10**.

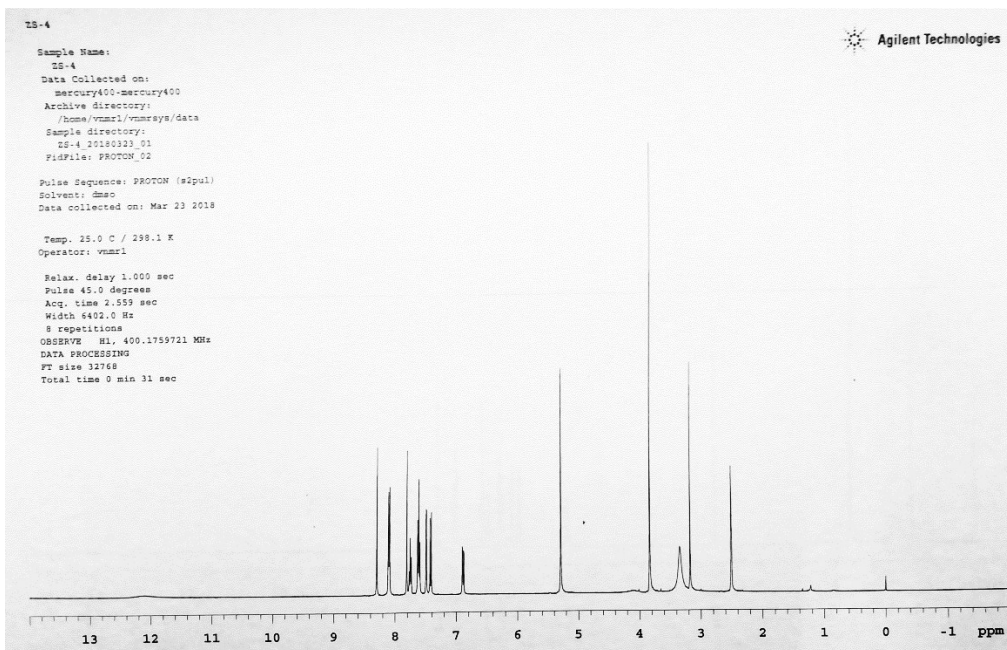

Suppl. Figure 3.  $^1\text{H}$  NMR spectrum of compound 11.

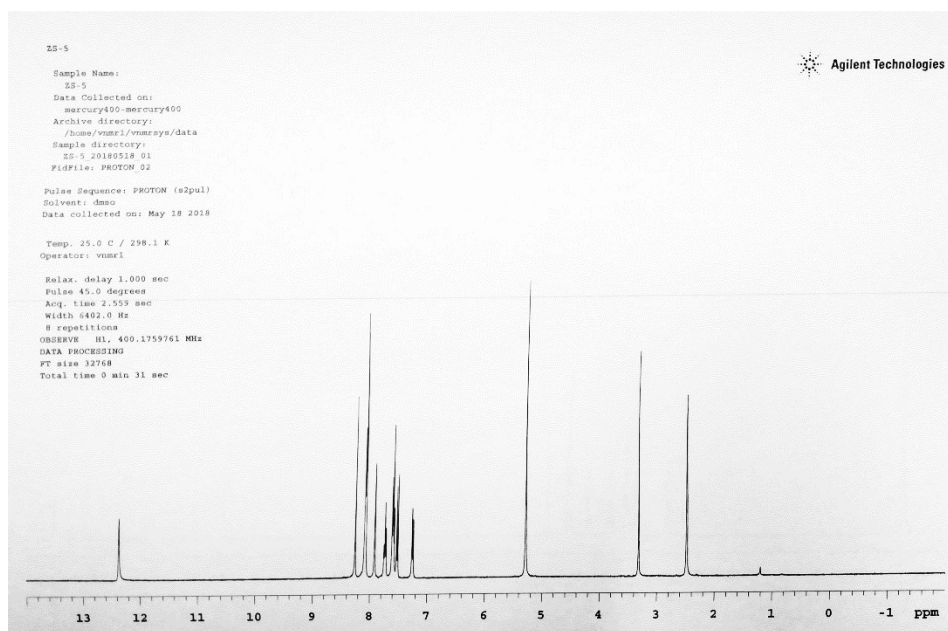

Suppl. Figure 4.  $^1\text{H}$  NMR spectrum of compound **12**.

ZS-9

Sample Name:  
ZS-9  
Data Collected on:  
mercury400-mercury400  
Archive directory:  
/home/vnmr1/vnmrsys/data  
Sample directory:  
ZS-9\_20180406\_01  
FIDFile: PROTON\_02

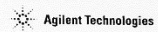

Pulse Sequence: PROTON (s2pul)  
Solvent: dmsc  
Data collected on: Apr 6 2018

Temp. 25.0 C / 298.1 K  
Operator: vnmr1

Relax. delay 1.000 sec  
Pulse 45.0 degrees  
Acq. time 2.559 sec  
Width 4422.0 Hz  
8 repetitions  
OBSERVE H1, 400.1759761 MHz  
DATA PROCESSING  
FT size 12768  
Total time 0 min 31 sec

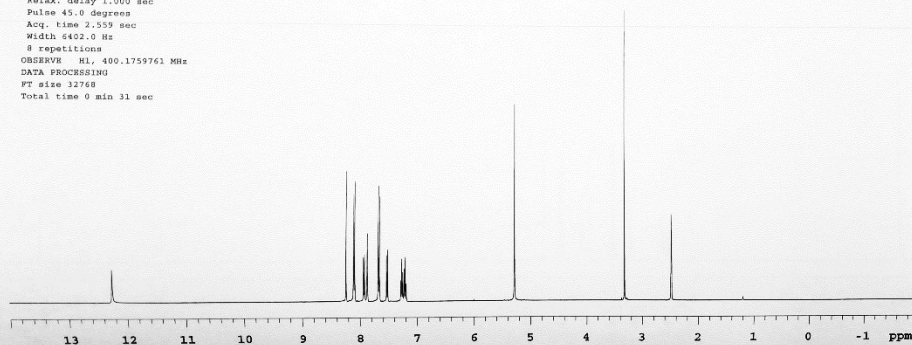

Suppl. Figure 5.  $^1\text{H}$  NMR spectrum of compound 13.

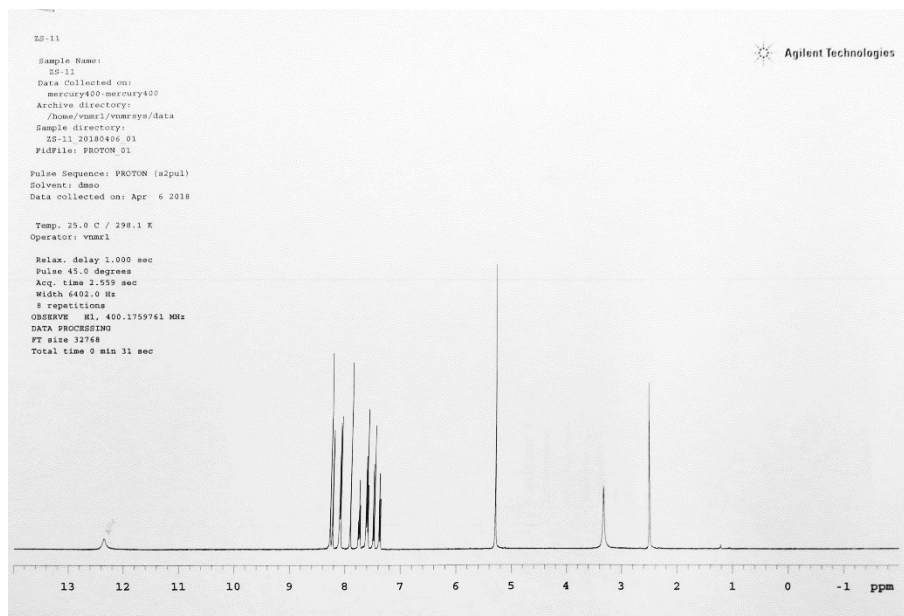

Suppl. Figure 6.  $^1\text{H}$  NMR spectrum of compound 14.

ZS-13

Sample Name:  
ZS-13  
Data Collected on:  
mercury400-mercury400  
Archive directory:  
/home/vmrc1/vmrcays/data  
Sample directory:  
ZS-13\_20180511\_03  
FidFile: PROTON\_01

Pulse Sequence: PROTON (s2pul)  
Solvent: dmsc  
Data collected on: May 11 2018

Temp. 25.0 C / 298.1 K  
Operator: vmrc1

Relax. delay 1.000 sec  
Pulse 45.0 degrees  
Acq. time 2.559 sec  
Width 6402.0 Hz  
8 repetitions  
OBSERVE F1: 400.1759761 MHz  
DATA PROCESSING  
FT size 32768  
Total time 0 min 31 sec

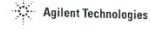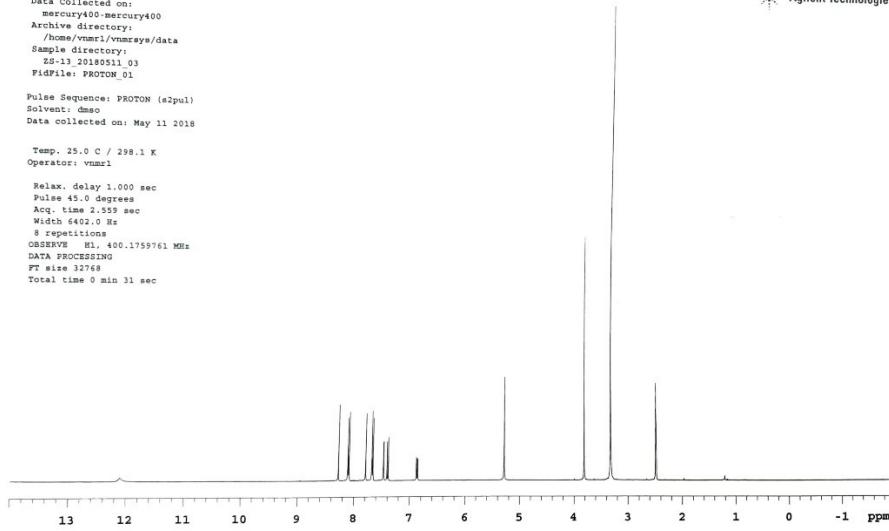

Suppl. Figure 7.  $^1\text{H}$  NMR spectrum of compound 15

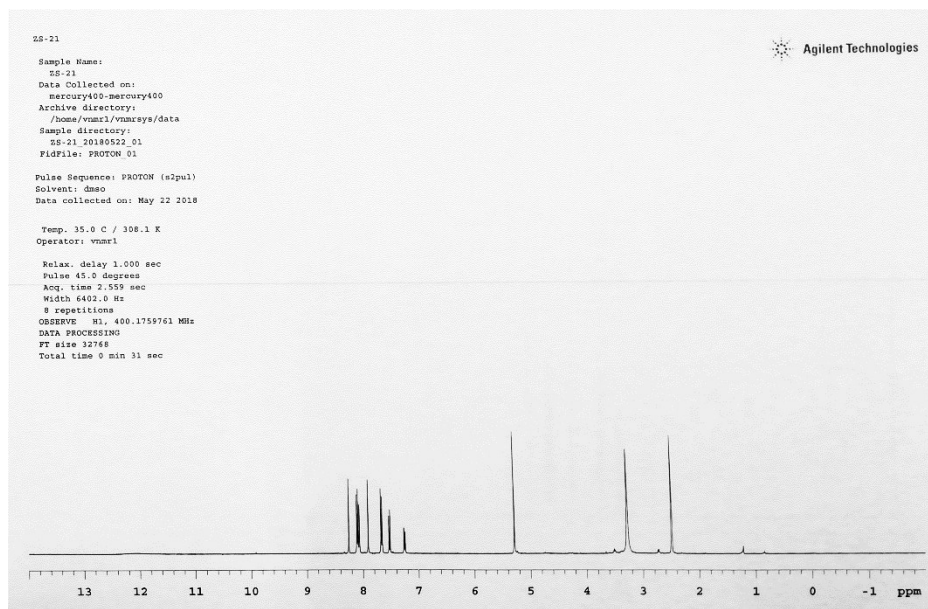

Suppl. Figure 8.  $^1\text{H}$  NMR spectrum of compound 16

ZS-22

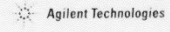

Sample Name:  
ZS-22  
Data Collected on:  
mercury400-mercury400  
Archive directory:  
/home/vnmr1/vnmrsys/data  
Sample directory:  
ZS-22\_20180522\_01  
Fidfile: PROTON\_04

Pulse Sequence: PROTON (s2pul)  
Solvent: dmsc  
Data collected on: May 22 2018

Temp. 35.0 C / 308.1 K  
Operator: vnmr1

Relax. delay 1.000 sec  
Pulse 45.0 degrees  
Acq. time 2:55 sec  
Width 6402.0 Hz  
8 repetitions  
OBSERVE H1, 400.1759761 MHz  
DATA PROCESSING  
FT size 32768  
Total time 0 min 31 sec

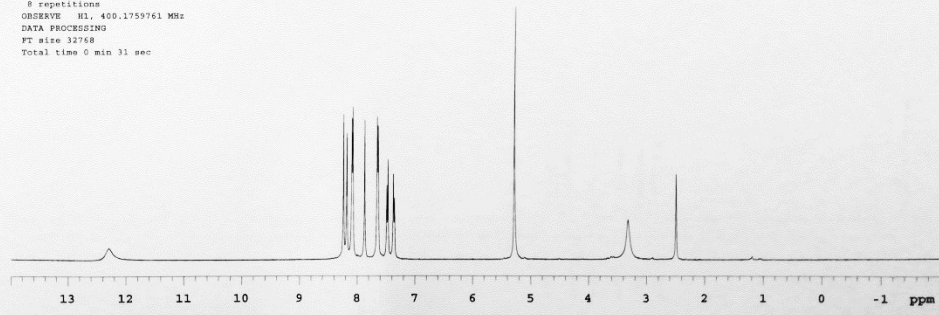



Suppl. Figure 9.  $^1\text{H}$  NMR spectrum of compound 17

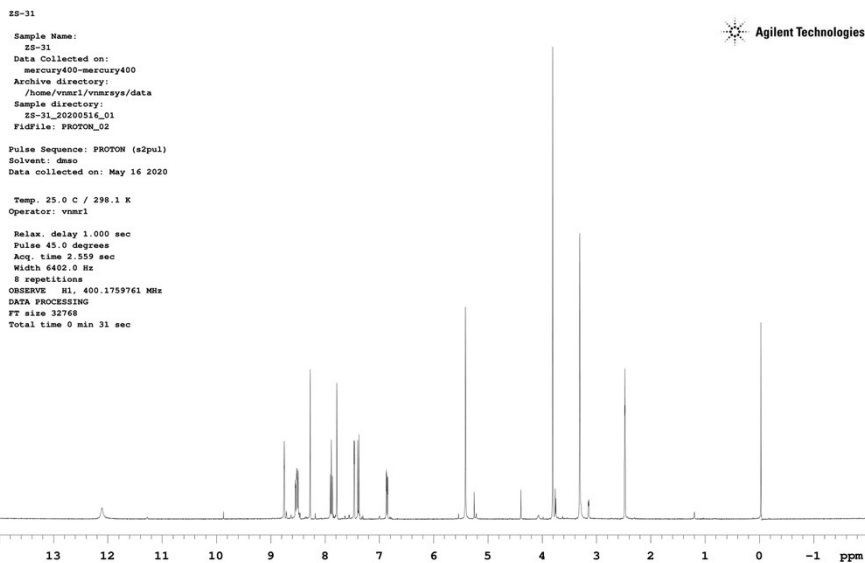

Suppl. Figure 10.  $^1\text{H}$  NMR spectrum of compound 18

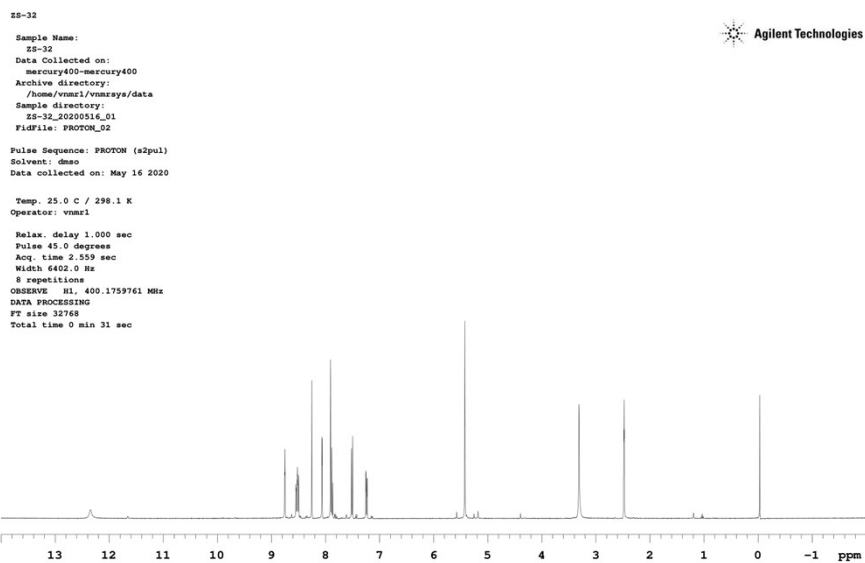

Suppl. Figure 11.  $^1\text{H}$  NMR spectrum of compound 19

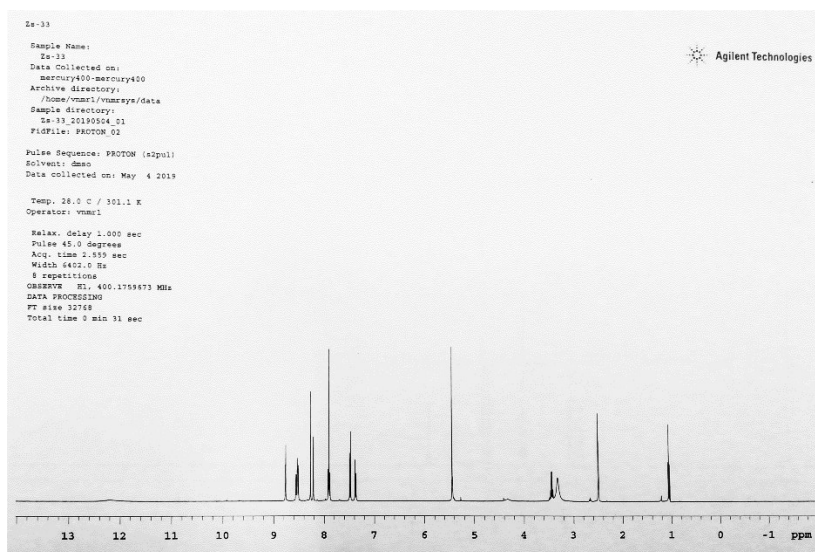

Suppl. Figure 12.  $^1\text{H}$  NMR spectrum of compound 20

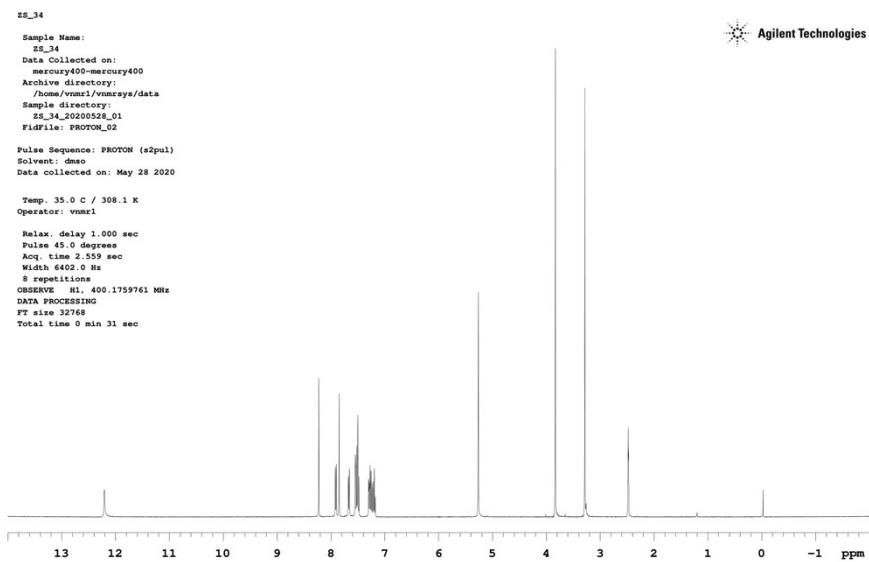

Suppl. Figure 13.  $^1\text{H}$  NMR spectrum of compound 21

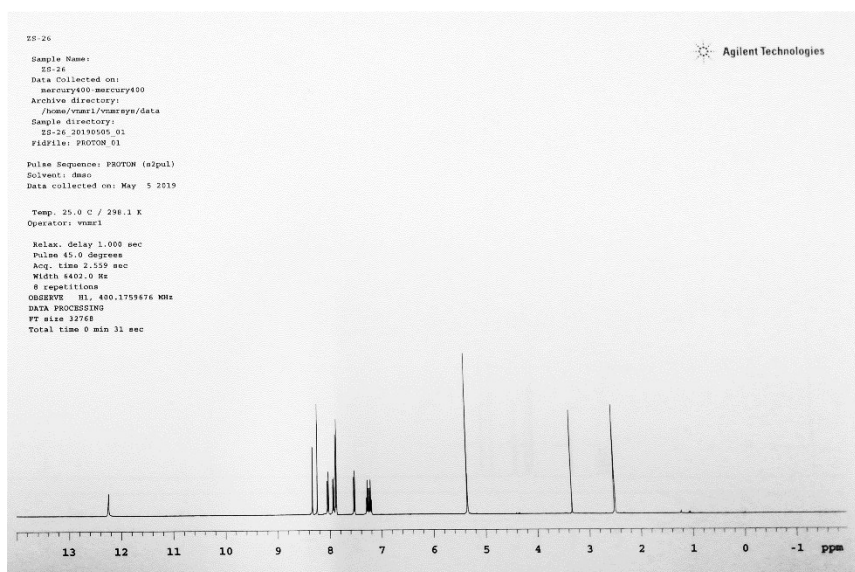

Suppl. Figure 14.  $^1\text{H}$  NMR spectrum of compound 22

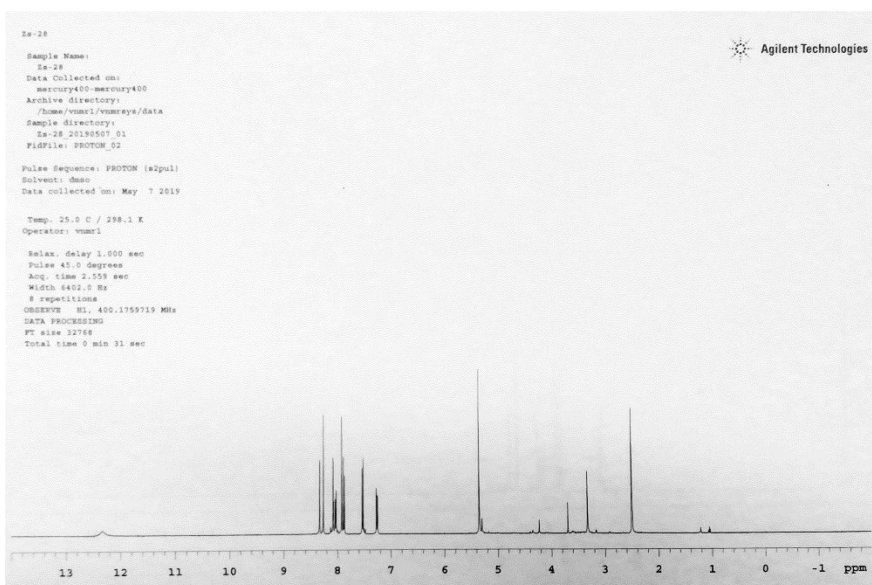

Suppl. Figure 15.  $^1\text{H}$  NMR spectrum of compound **23**.

Zs-29  
Sample Name:  
Zs-29  
Data Collected on:  
mercury400-mercury400  
Archive directory:  
/home/vnmr1/vnmrsys/data  
Sample directory:  
Zs-29\_20190507\_01  
FidFile: PROTON  
Pulse Sequence: PROTON (s2pul)  
Solvent: dmsd  
Data collected on: May 7 2019  
Temp. 25.0 C / 298.1 K  
Operator: vnmr1  
Relax. delay 1.000 sec  
Pulse 45.0 degrees  
Acq. time 2.559 sec  
Width 6402.0 Hz  
8 repetitions  
OBSERVE H1, 400.1759722 MHz  
DATA PROCESSING  
F2 size 32768  
Total time 0 min 31 sec

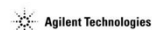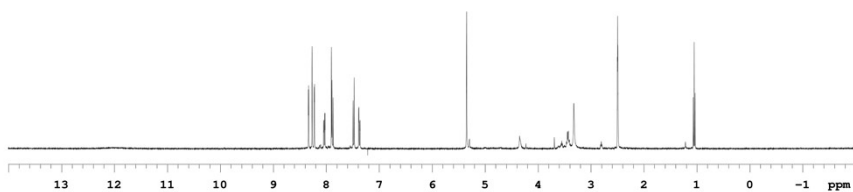

Suppl. Figure 16. <sup>1</sup>H NMR spectrum of compound 24.

ZS-40  
Sample Name:  
ZS-40  
Data Collected on:  
mercury400-mercury400  
Archive directory:  
/home/vnmr1/vnmrsys/data  
Sample directory:  
ZS-40\_20200516\_01  
FidFile: PROTON\_02  
Pulse Sequence: PROTON (s2pul)  
Solvent: dmsd  
Data collected on: May 16 2020  
Temp. 25.0 C / 298.1 K  
Operator: vnmr1  
Relax. delay 1.000 sec  
Pulse 45.0 degrees  
Acq. time 2.559 sec  
Width 6402.0 Hz  
8 repetitions  
OBSERVE H1, 400.1759653 MHz  
DATA PROCESSING  
F2 size 32768  
Total time 0 min 31 sec

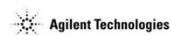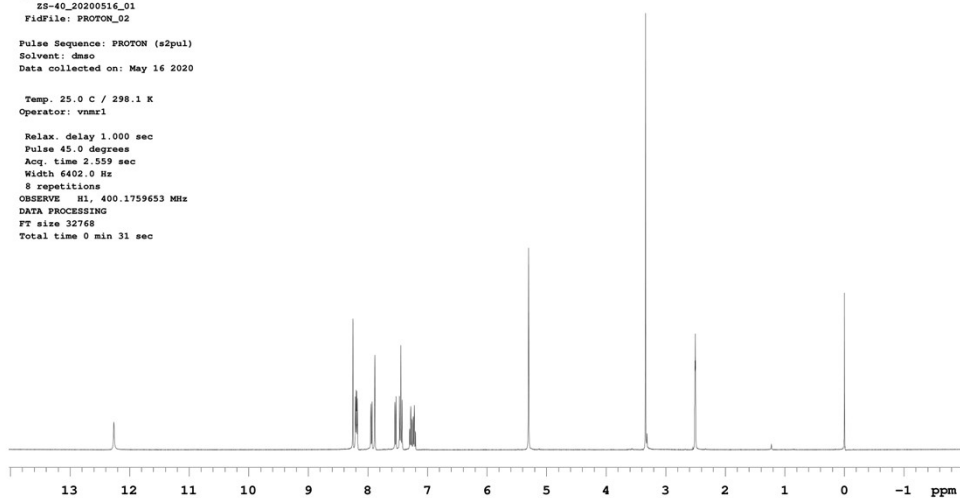

**Suppl. Figure 17. FTIR spectrum of compound 9.**

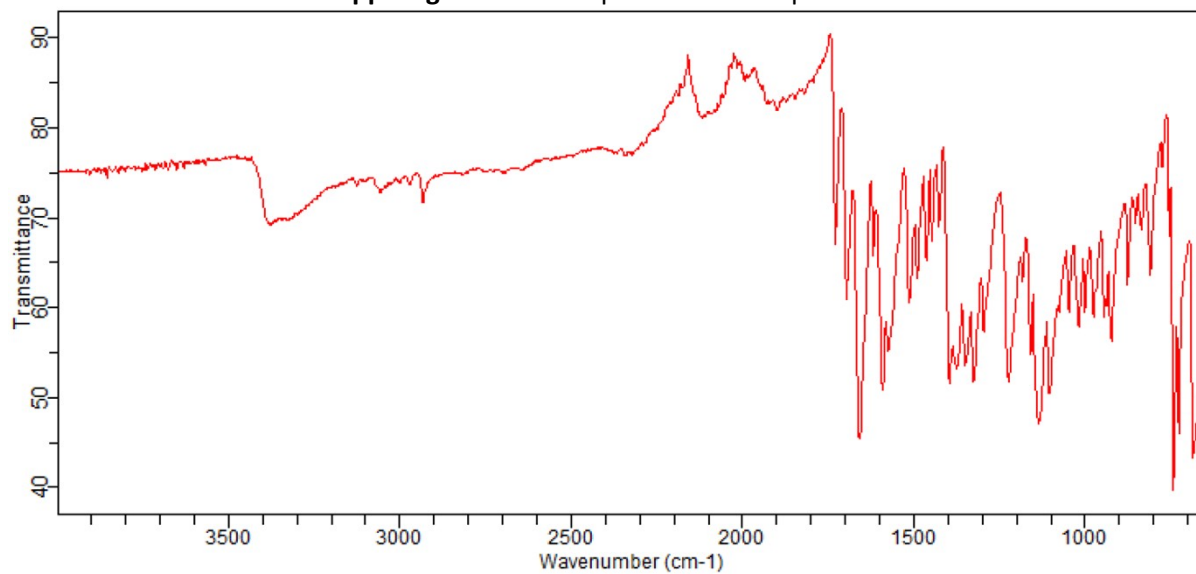

**Suppl. Figure 18. FTIR spectrum of compound 10.**

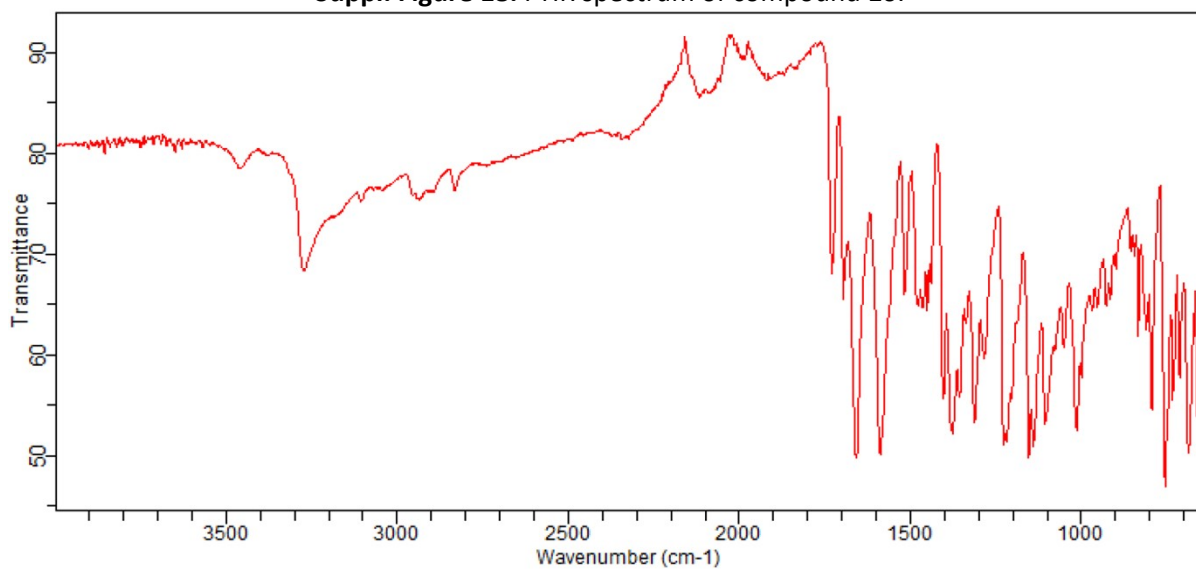

**Suppl. Figure 19. FTIR spectrum of compound 11.**

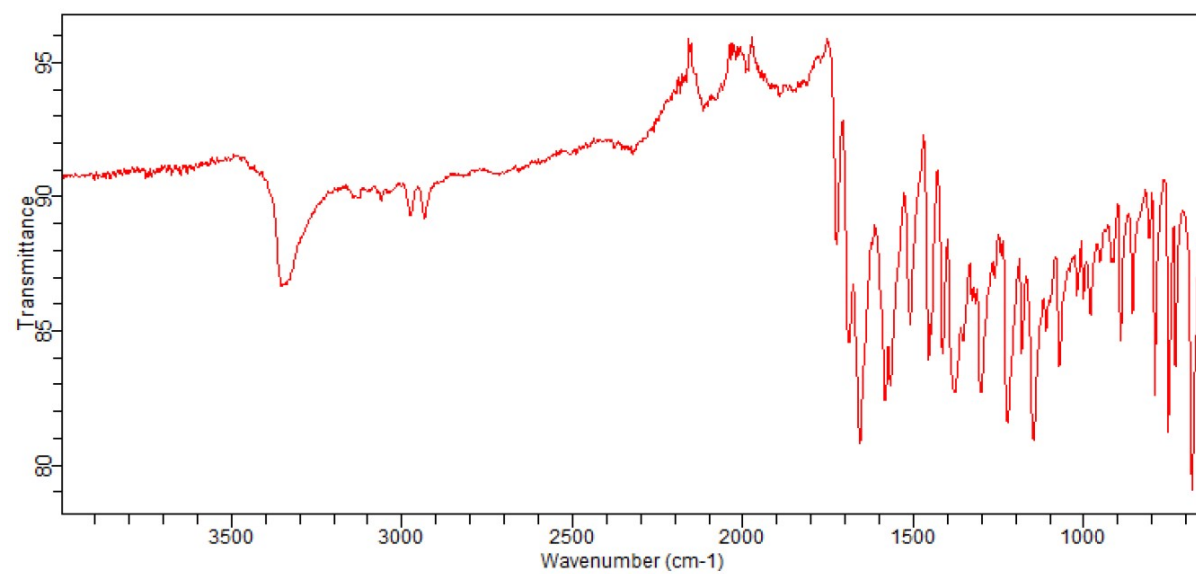

**Suppl. Figure 20.** FTIR spectrum of compound **12**.

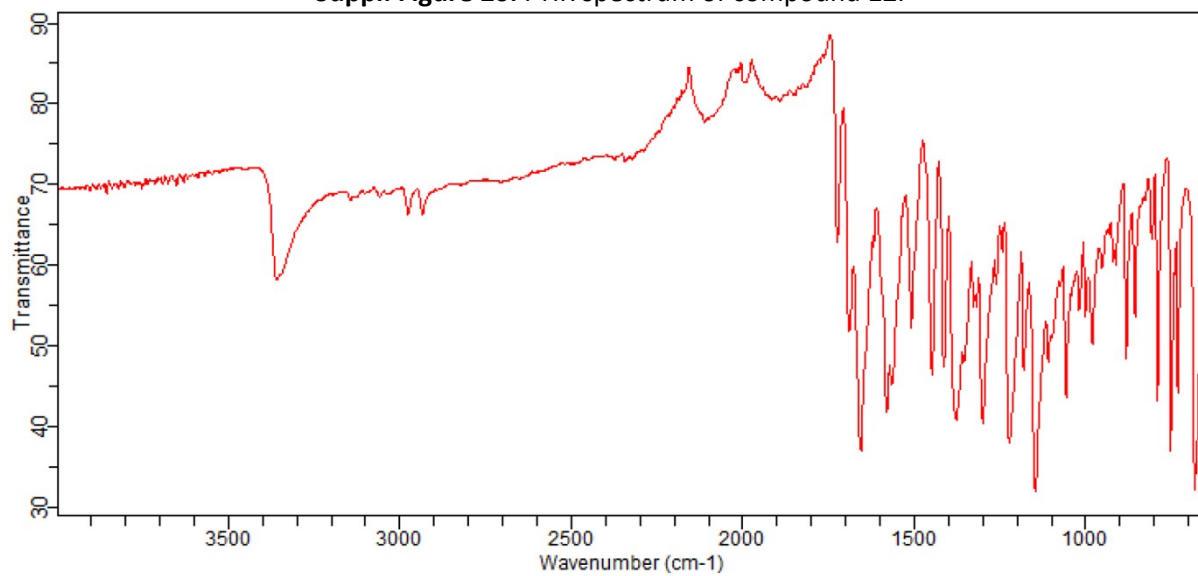

**Suppl. Figure 21.** FTIR spectrum of compound **13**.

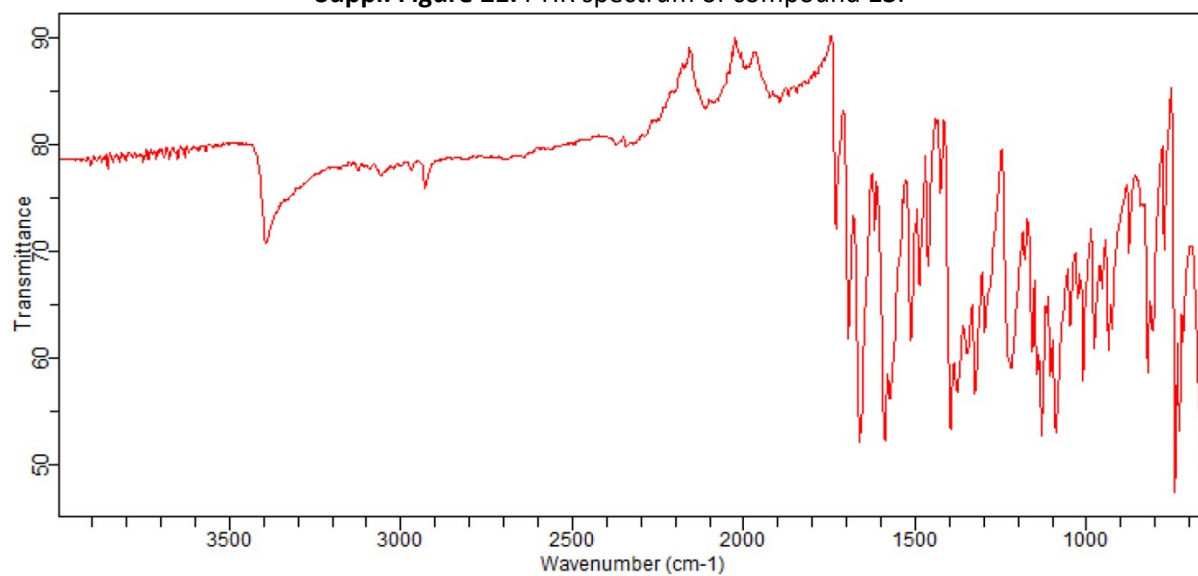

**Suppl. Figure 22.** FTIR spectrum of compound **14**.

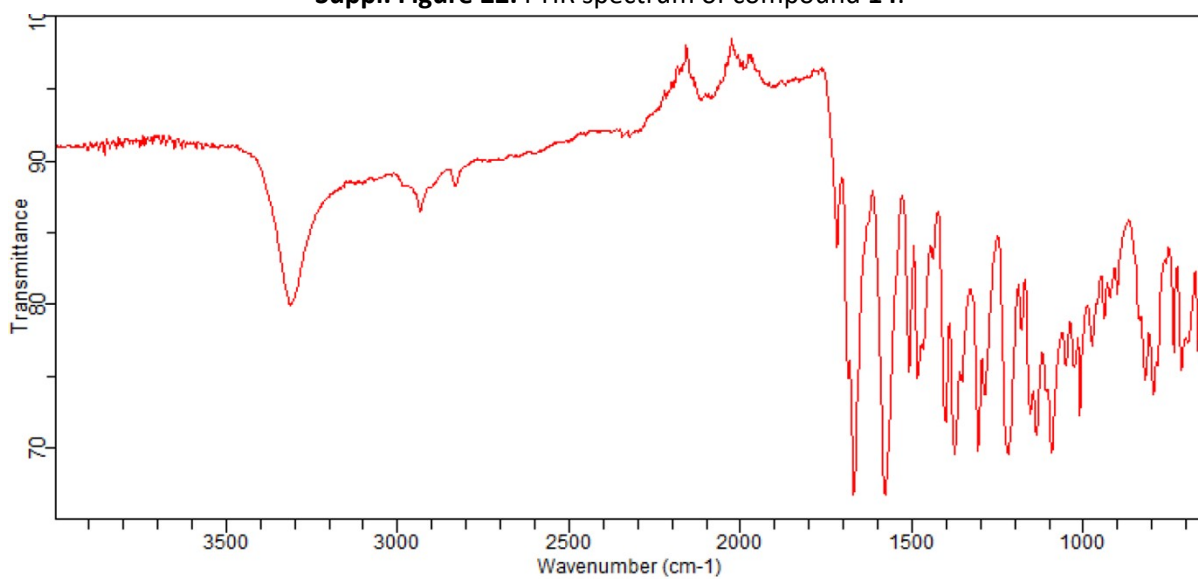

**Suppl. Figure 23. FTIR spectrum of compound 15.**

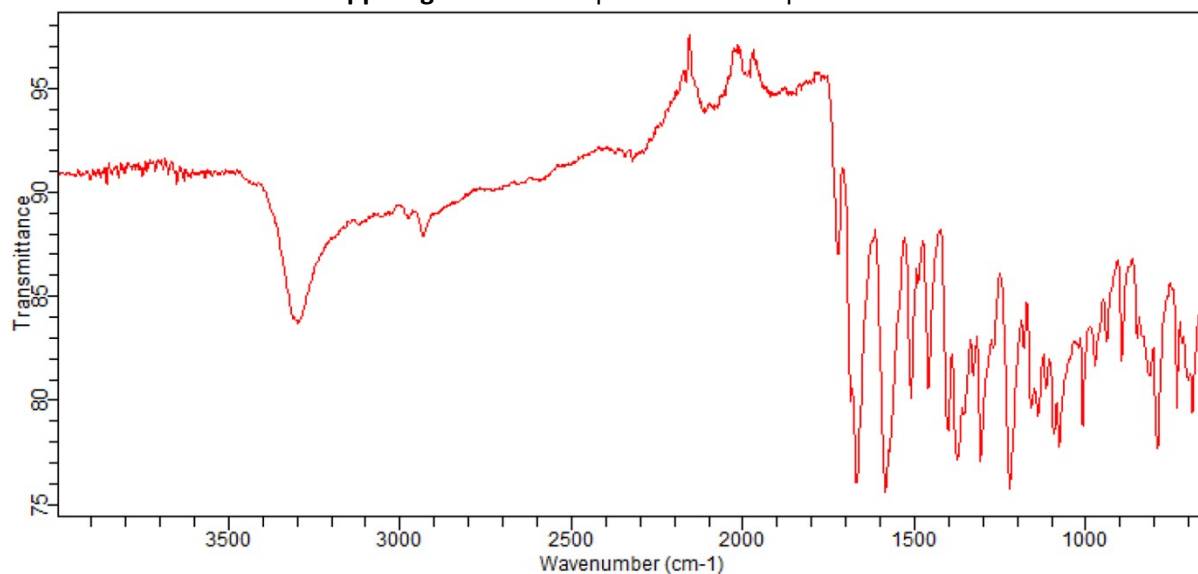

**Suppl. Figure 24. FTIR spectrum of compound 16.**

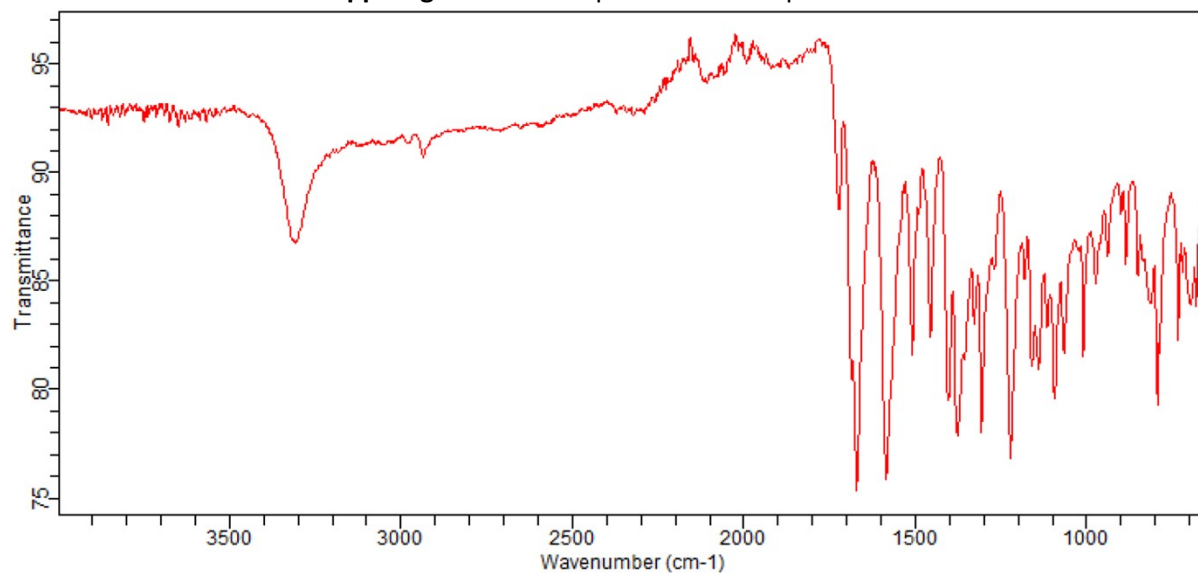

**Suppl. Figure 25. FTIR spectrum of compound 17.**

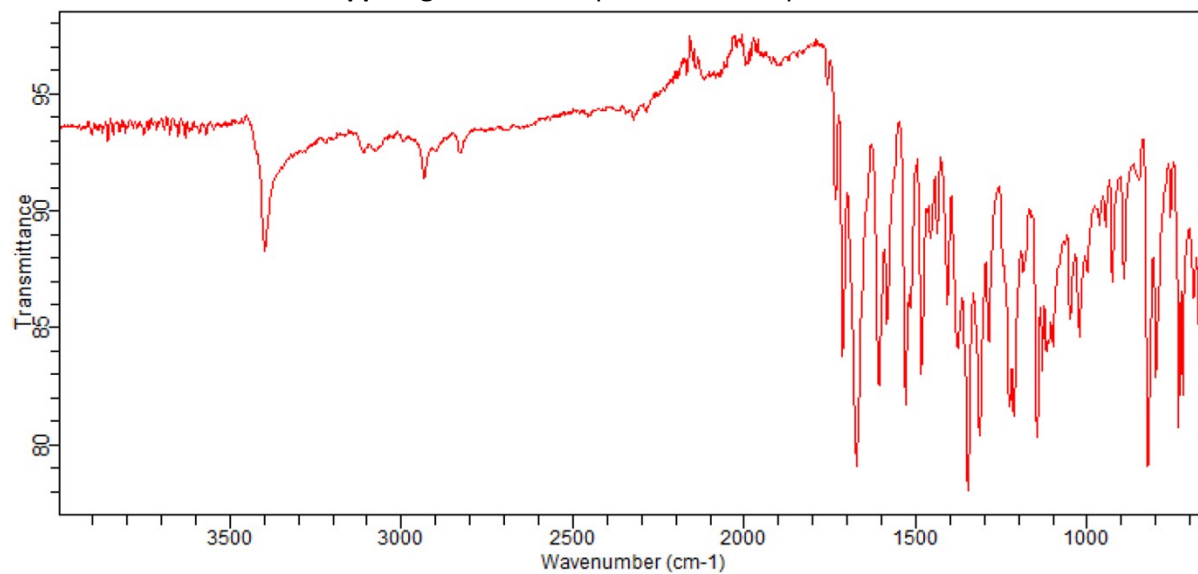



**Suppl. Figure 26. FTIR spectrum of compound 18.**

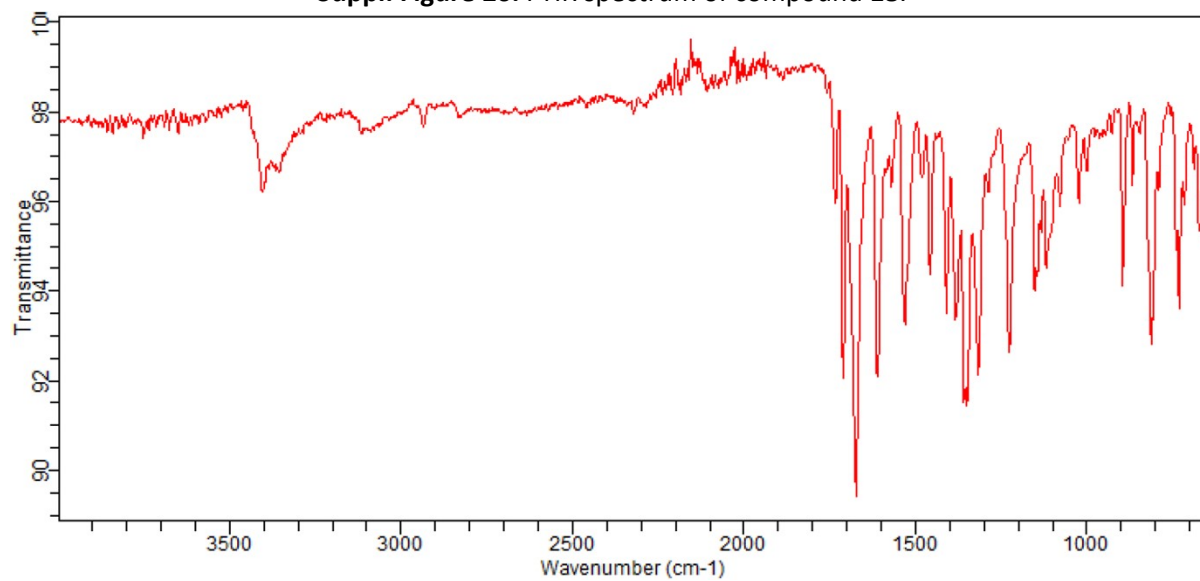

**Suppl. Figure 27. FTIR spectrum of compound 19.**

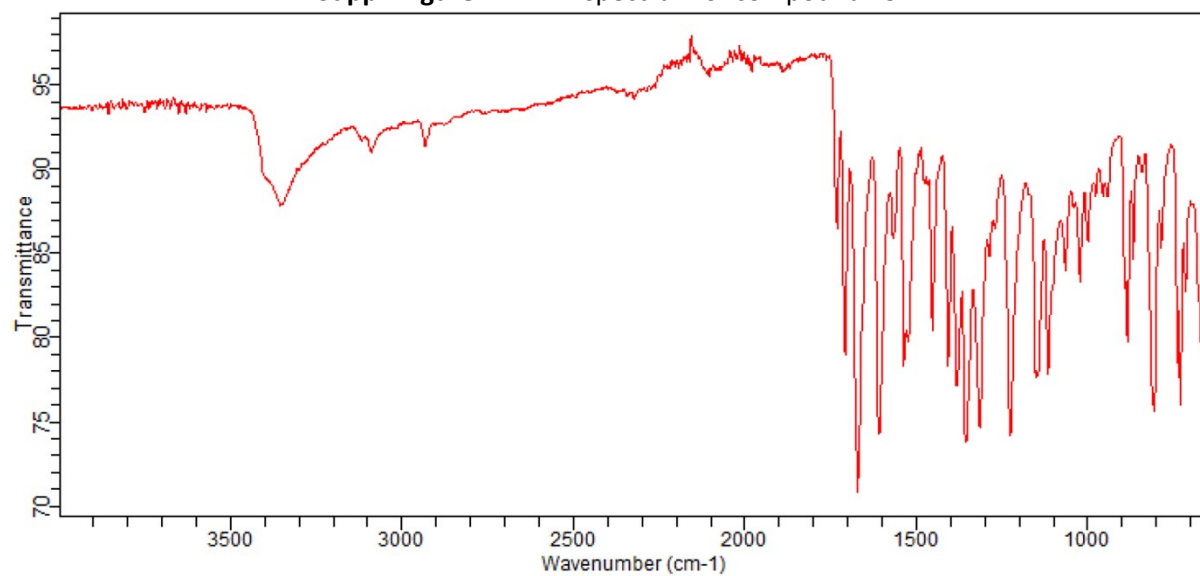

**Suppl. Figure 28. FTIR spectrum of compound 20.**

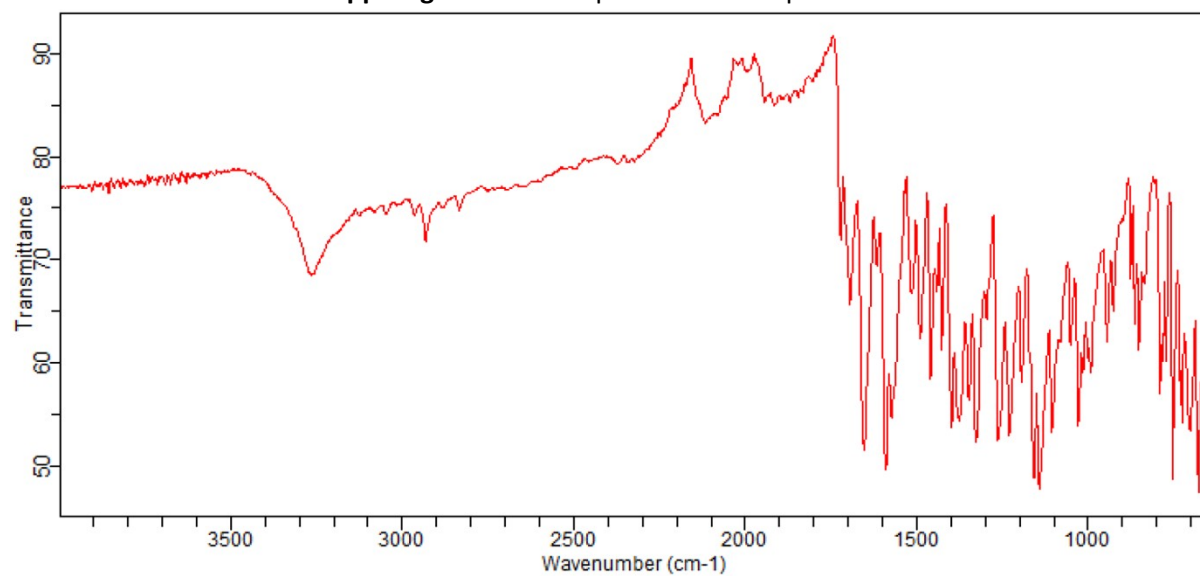

**Suppl. Figure 29.** FTIR spectrum of compound **21**.

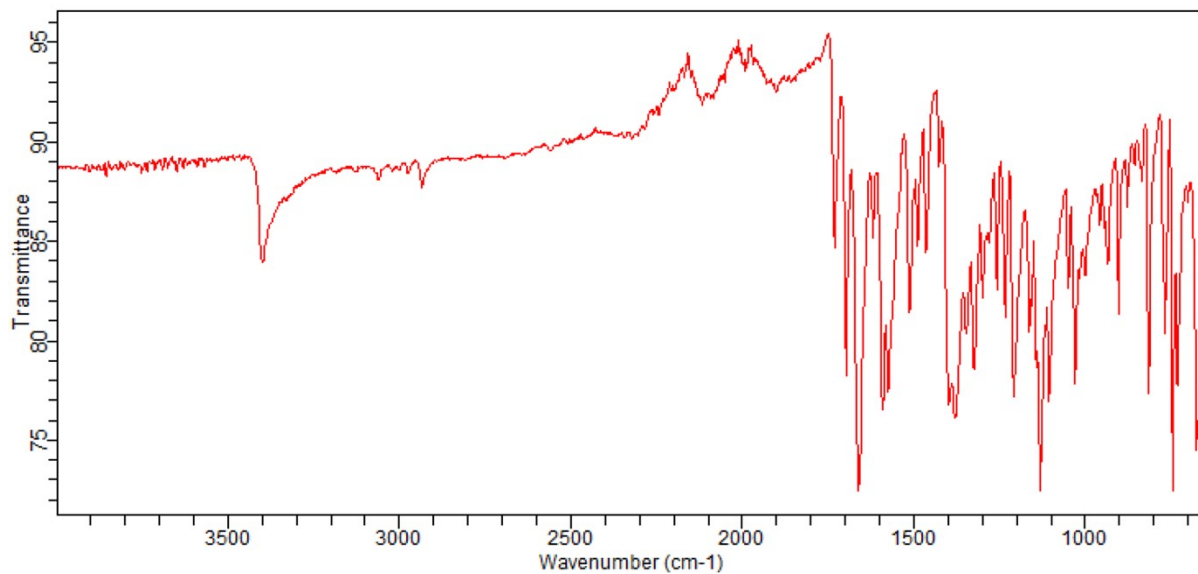

**Suppl. Figure 30.** FTIR spectrum of compound **22**.

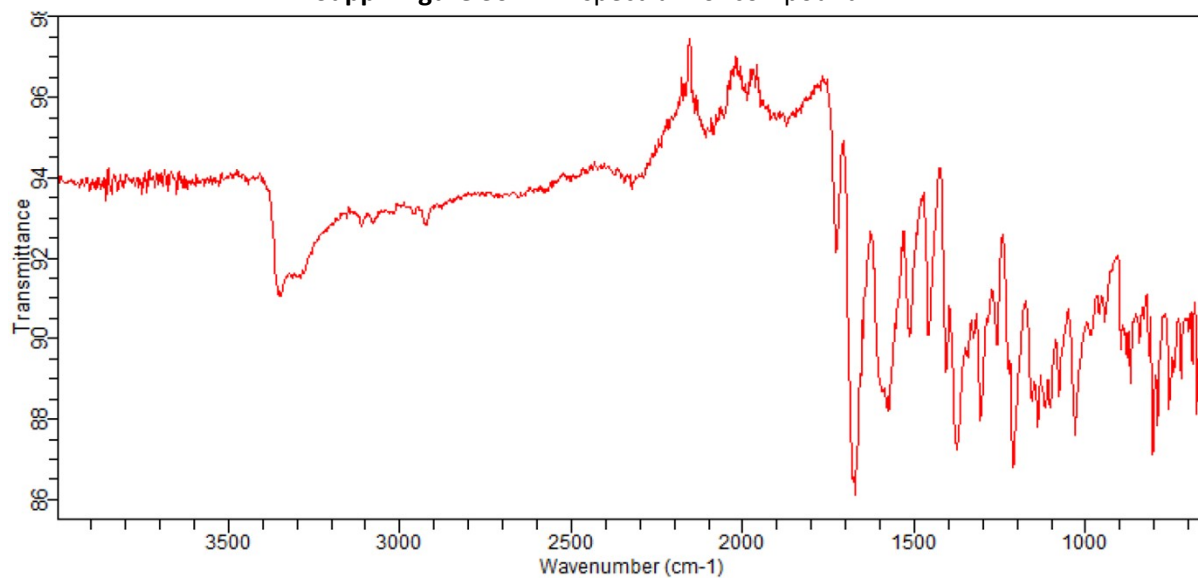

**Suppl. Figure 31.** FTIR spectrum of compound **23**.

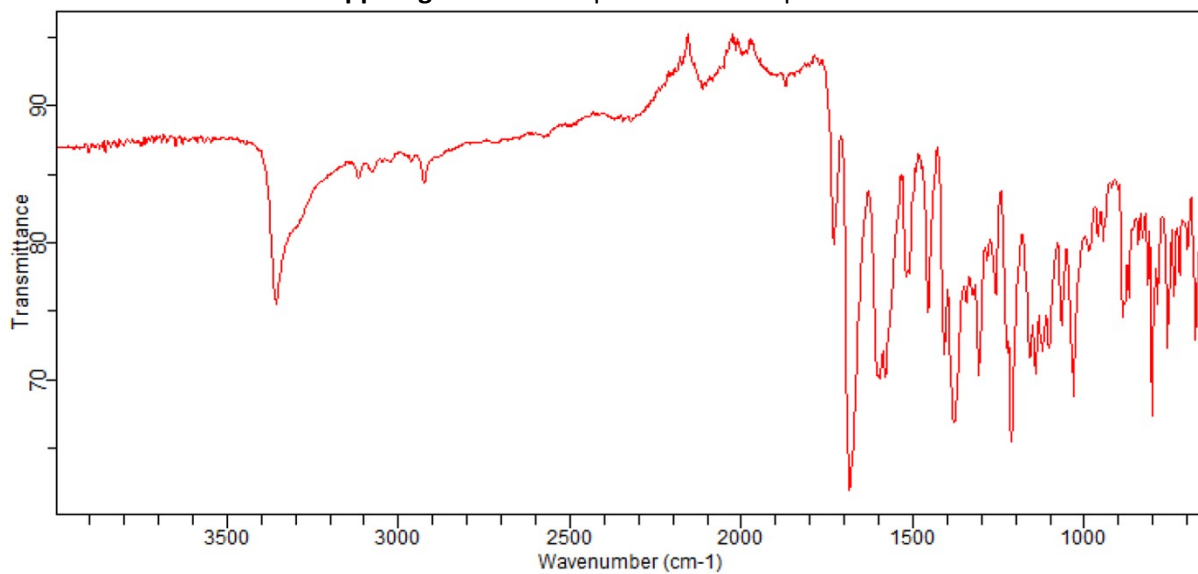

Suppl. Figure 32. FTIR spectrum of compound 24.

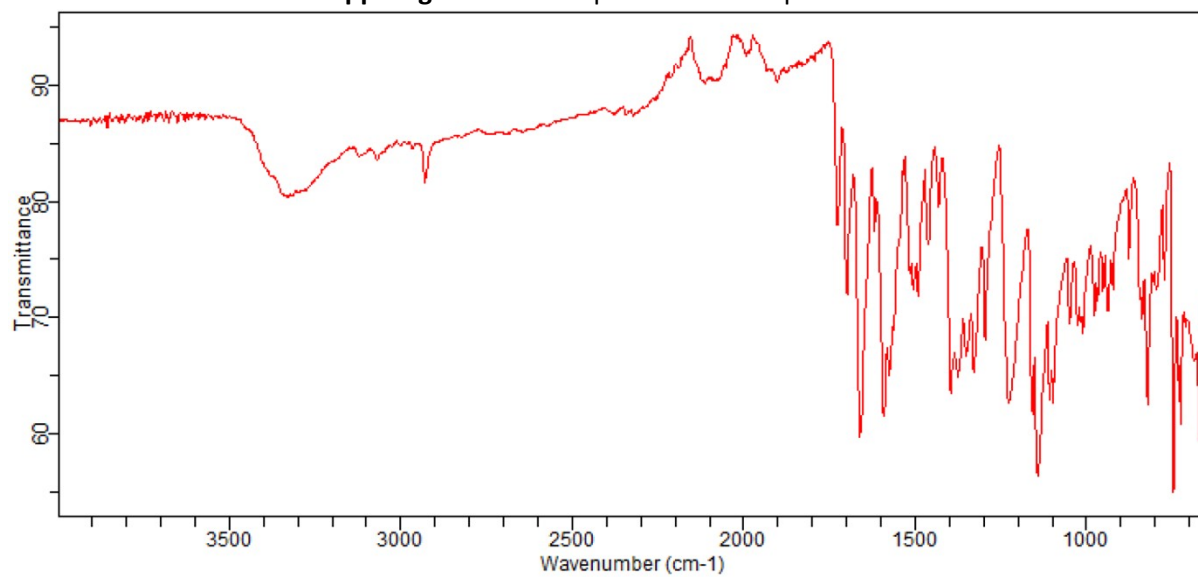

Supplement: d1nj02808a1.pdf [file d1nj02808a1.pdf]
